# Supplementary material
Source: publisher figshare collection journal article supplement (https://frontiersin.figshare.com/ndownloader/files/23042699)
Supplement: Supplementary file [file 23042699]

## Supplementary Material

# Dual-targeting Nanoparticle-mediated Gene Therapy Strategy for Hepatocellular Carcinoma by Delivering Small Interfering RNA

Qi Chang Zheng<sup>1†</sup>, Shuai Jiang<sup>1†</sup>, Yu Zhe Wu<sup>1</sup>, Dan Shang<sup>2</sup>, Yong Zhang<sup>1</sup>, Shao Bo Hu<sup>1</sup>, Xiang Cheng<sup>1</sup>, Chen Zhang<sup>1</sup>, Ping Sun<sup>1</sup>, Yang Gao<sup>1</sup>, Zi Fang Song<sup>1\*</sup>, Min Li<sup>1\*</sup>

<sup>1</sup>Department of Hepatobiliary Surgery, Union Hospital, Tongji Medical College, Huazhong University of Science and Technology, Wuhan, China

<sup>2</sup>Department of Vascular Surgery, Union Hospital, Tongji Medical College, Huazhong University of Science and Technology, Wuhan, China

**\* Correspondence:**

Min Li, [liminmed@hust.edu.cn](mailto:liminmed@hust.edu.cn); Zi Fang Song, [zsong@hust.edu.cn](mailto:zsong@hust.edu.cn)

† These authors contributed equally to this work.

# Figures

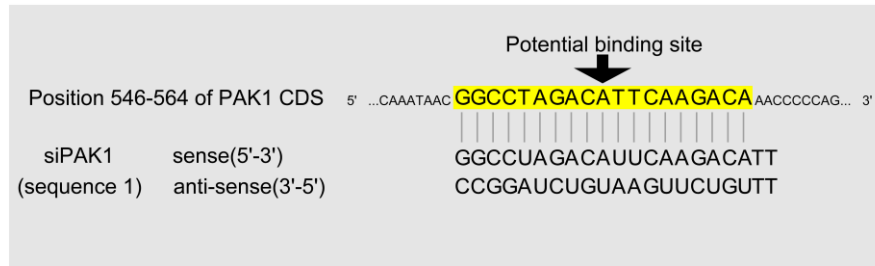

**Supplementary Figure S1.** Potential siPAK1 binding site in PAK1 sequence.

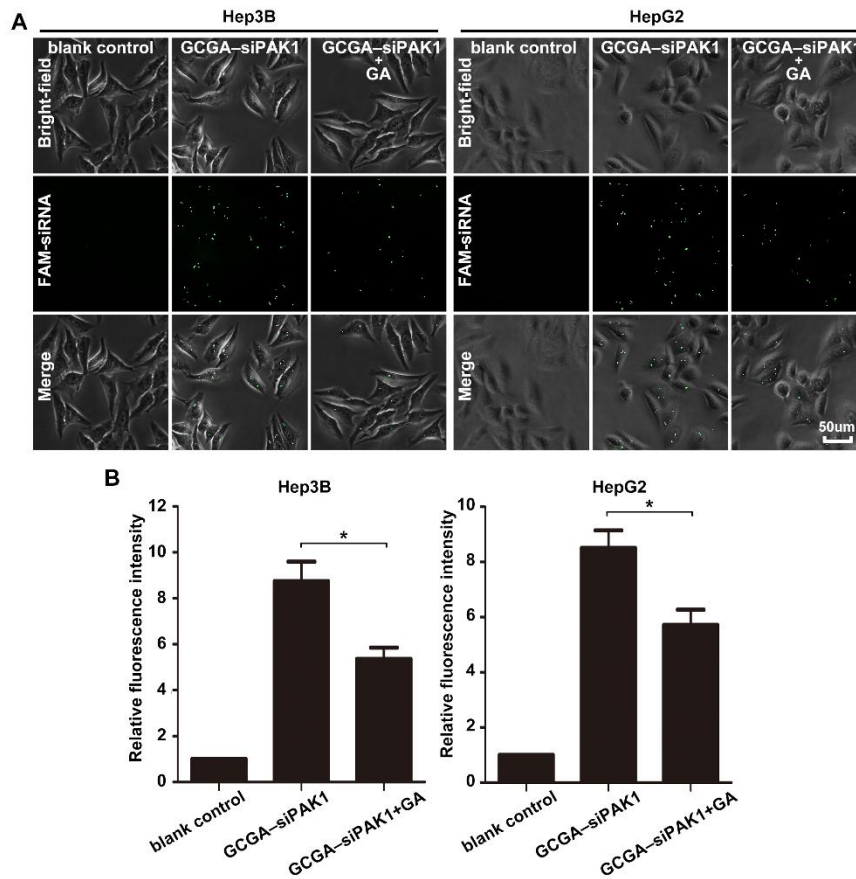

**Supplementary Figure S2.** (A) Fluorescence images of GCGA-siPAK1 in HCC cells pretreated with free GA (100 ug/mL)

for 30 min. (B) Statistical analysis of fluorescence intensity according to (A).

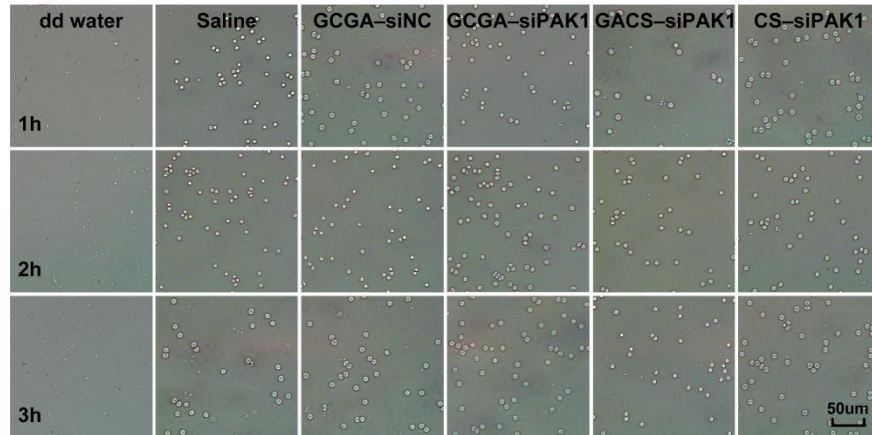

**Supplementary Figure S3.** Hemolysis assay of RBCs. RBCs were incubated with different NP formulations for 1, 2 and 3 h, respectively. Optical microscopic observations of erythrocytes after incubation with distilled water, saline, and NPs.

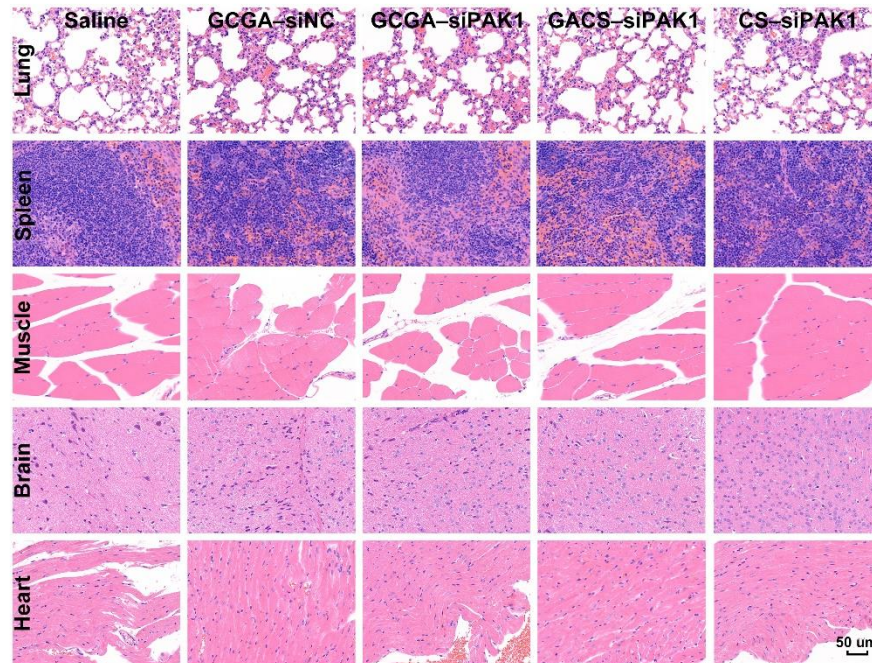

**Supplementary Figure S4.** Histopathologic images (400x) with H&E staining. Various organ sliced from mice on the

eighth day following different treatments.

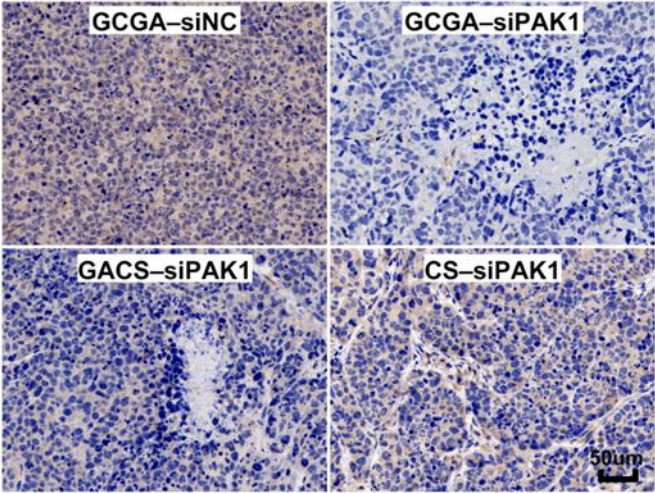

**Supplementary Figure S5.** The immunohistochemical staining of PAK1 in tumor sections.
